# Supplementary material for: Adsorption behavior of Rhodamine B on nanoporous polymers
Source: Royal Society of Chemistry journal article supplement (doi:10.1039/c5ra21130a), 2015-01-01
Supplement: c5ra21130a1.pdf [file c5ra21130a1.pdf]

# Electronic Supplementary Information

## **Adsorption behavior of rhodamine B on nanoporous polymer**

Yide Han, Weiwei Li, Jing Zhang, Hao Meng, Yan Xu and Xia Zhang\*

Department of Chemistry, College of Science, Northeastern University, Shenyang,  
Liaoning, 110819, P.R. China



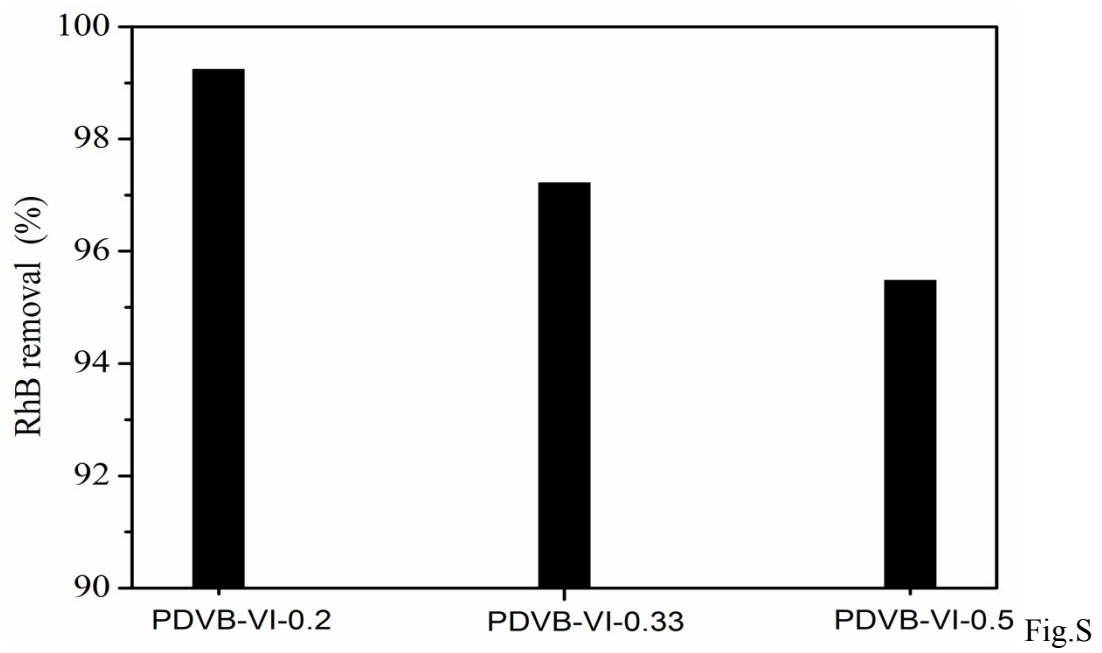

2 Removal efficiency of RhB on nanoporous polymers.

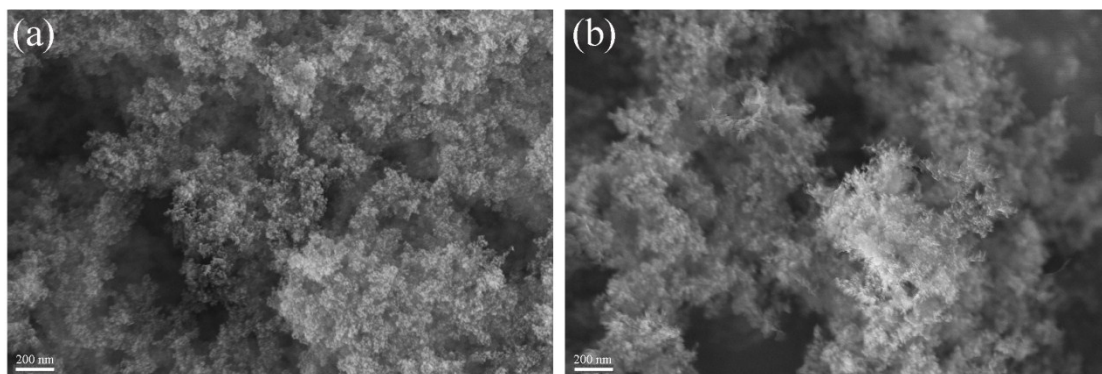

Fig. S3 SEM images of PDVB-VI-0.33 (a) and PDVB-VI-0.5 (b).

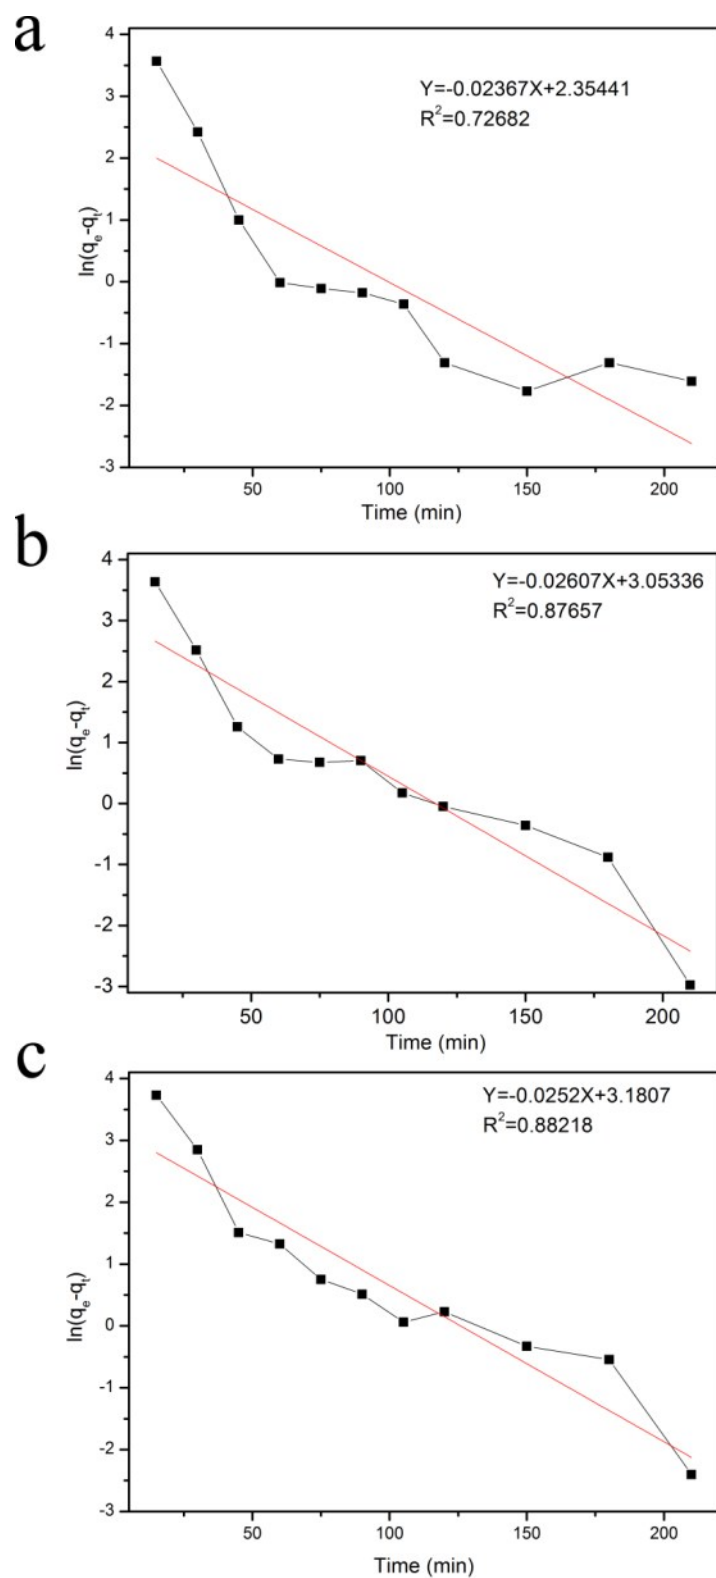

Fig. S4 Pseudo-first-order kinetics of RhB adsorption on PDVB-VI-0.2 at 298 K (a), 308 K (b) and 318 K (c).

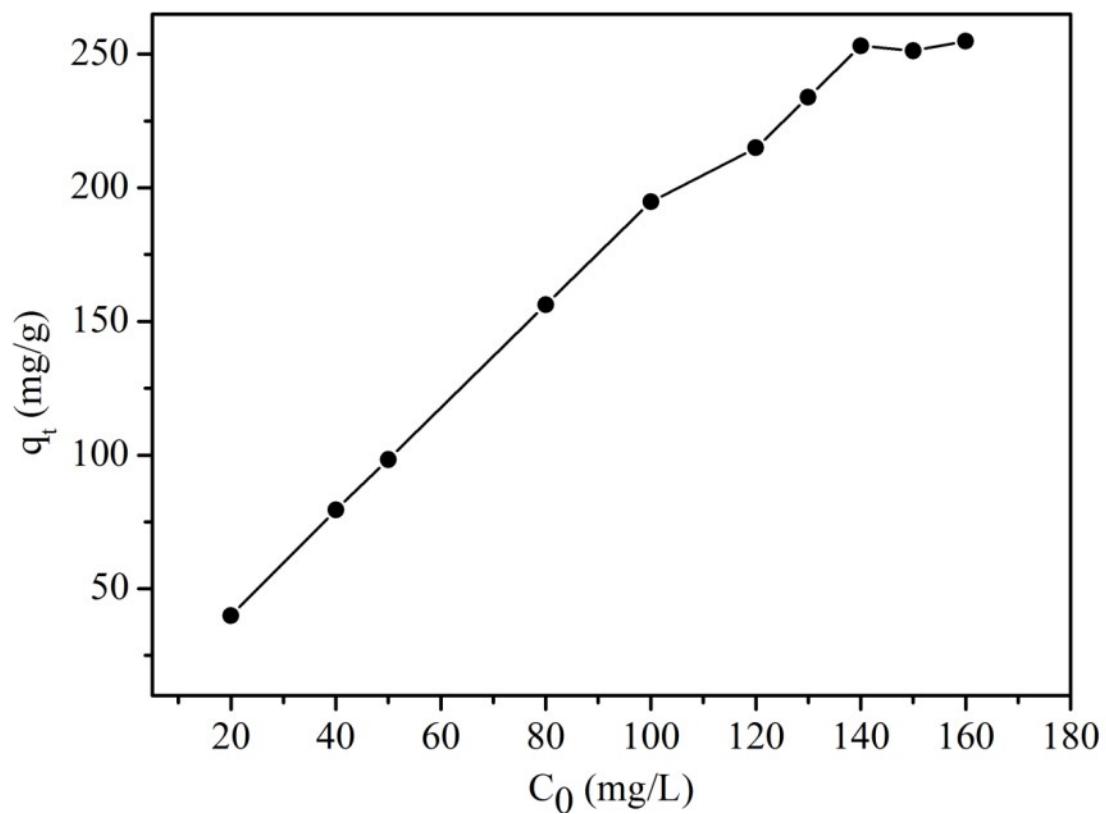

Fig. S5 PDVB-VI-0.2 was used to adsorb RhB in solution with different concentrations (mg/L)

Table S1 Comparison of PDVB-VI-0.2 adsorption capacity for RhB with other adsorptions.

| Material                                                             | Surface area of adsorbent | Adsorption capacity | Concentration | Contact time | pH      | Source    |
|----------------------------------------------------------------------|---------------------------|---------------------|---------------|--------------|---------|-----------|
| Reduced graphene oxide                                               | 298.2 m <sup>2</sup> /g   | 29.44 mg/g          | 0.5- 10 mg/L  | 120 min      | 6.4     | S1        |
| Jute stick powder                                                    | 32.6 m <sup>2</sup> /g    | 87.7 mg/g           | -             | 60 min       | 7.0     | S2        |
| Carbonaceous adsorbent                                               | 380 m <sup>2</sup> /g     | 91.1 mg/g           | -             | 30 min       | 5.5-6.5 | S3        |
| Iron-pillared bentonite                                              | -                         | 98.62 mg/g          | 10-50 mg/L    | 1440 min     | 5.0     | S4        |
| PDVB-VI-0.2                                                          | 737 m <sup>2</sup> /g     | 260.42 mg/g         |               | 60 min       | 3-11    | This work |
| BPH active carbon                                                    | 522.7 m <sup>2</sup> /g   | 263.85 mg/g         | 100-600 mg/L  | 240 min      | 5.7     | S5        |
| Active carbon(scrap tires)                                           | 720 m <sup>2</sup> /g     | 307.2 mg/g          | 20-50 mg/L    | 300 min      | 4       | S6        |
| Active carbon (Rcie husk)                                            | 1803 m <sup>2</sup> /g    | 478.15 mg/g         | 100-600 mg/L  | 300 min      | -       | S7        |
| Covalent triazine framework                                          | 2071 m <sup>2</sup> /g    | 483.8 mg/g          | -             | 55 min       | 1-11    | S8        |
| Fe <sub>3</sub> O <sub>4</sub> magnetic nanoparticles-graphene oxide | -                         | 690 mg/g            | -             | 10 min       | 7.0     | S9        |

S1. J. N. Tiwari, K. Mahesh, N. H. Le, K. C. Kemp, R. Timilsina, R. N. Tiwari, K. S. Kim, *Carbon* 2013, 56, 173–182.

S2. G. C. Panda, S. K. Das, A. K. Guha, *Journal of Hazardous Materials* 2009, 164, 374–379.

S3.. A. Bhatnagar, A. K. Jain, *Journal of Colloid and Interface Science* 2005, 281, 49–55.

S4 .M. Hou, C. Ma, W. Zhang, X. Tang, Y. Fan, H. Wan, *Journal of Hazardous Materials* 2011, 186, 1118–1123.

S5. H. M. H. Gad, A. A. El-Sayed, *Journal of Hazardous Materials* 2009, 168, 1070–1081.

S6. L. Li, S. Liu, T. Zhu, *Journal of Environmental Sciences*, 2010, 22, 1273–1280.

S7. L. Ding, B. Zou, W. Gao, Q. Liu, Z. Wang, Y. Guo, X. Wang, Y. Liu, *Colloids and Surfaces A: Physicochem. Eng. Aspects*, 2014, 446, 1–7.

S8. T. Wang, K. Kailasam, P. Xiao, G. Chen, L. Chen, L. Wang, J. Li, J. Zhu, *Microporous and Mesoporous Materials* 2014, 187, 63–70.

S9. J. Chen, Y. Hao, Y. Liu, J. Gou, *RSC Advances*, 2013, 3, 7254–7258

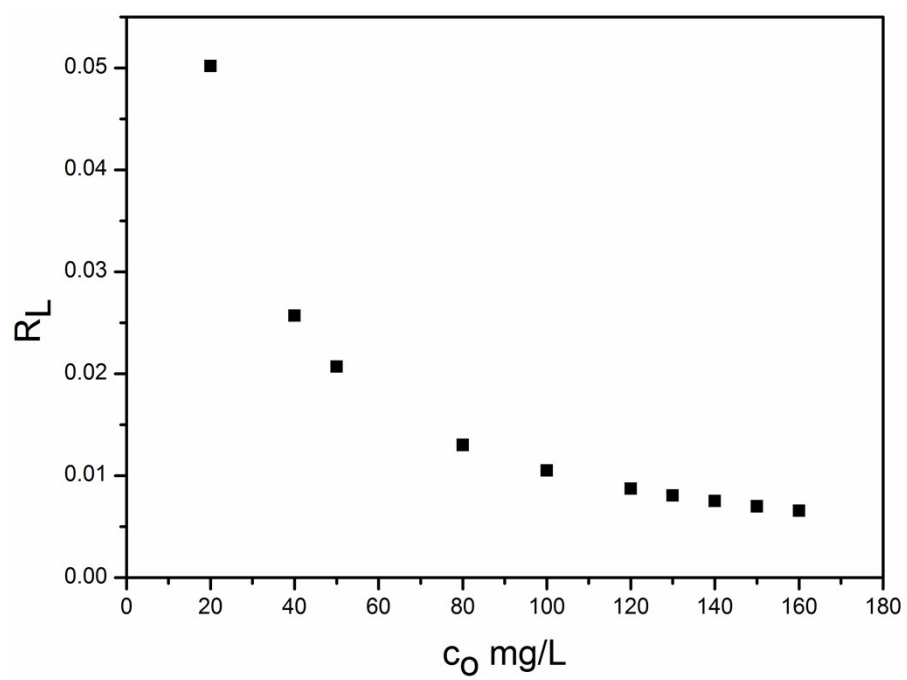

Fig. S6 Separation factor  $R_L$  for adsorption of RhB by PDVB-VI-0.2.



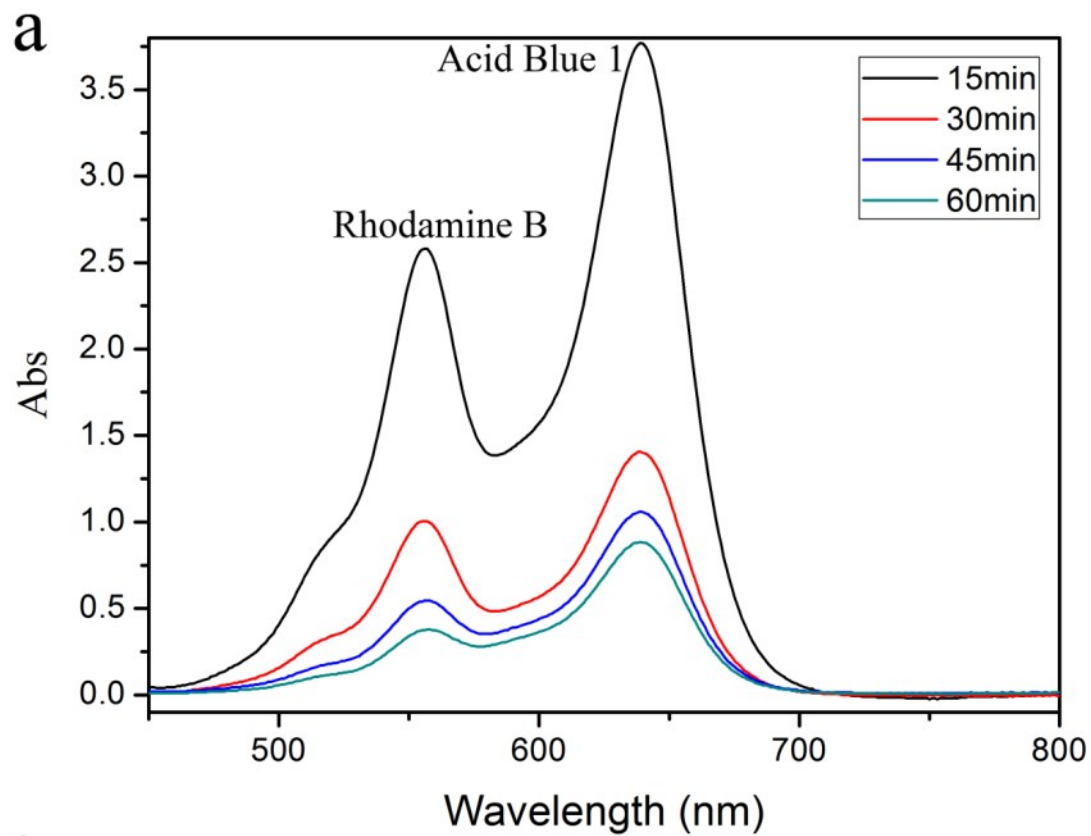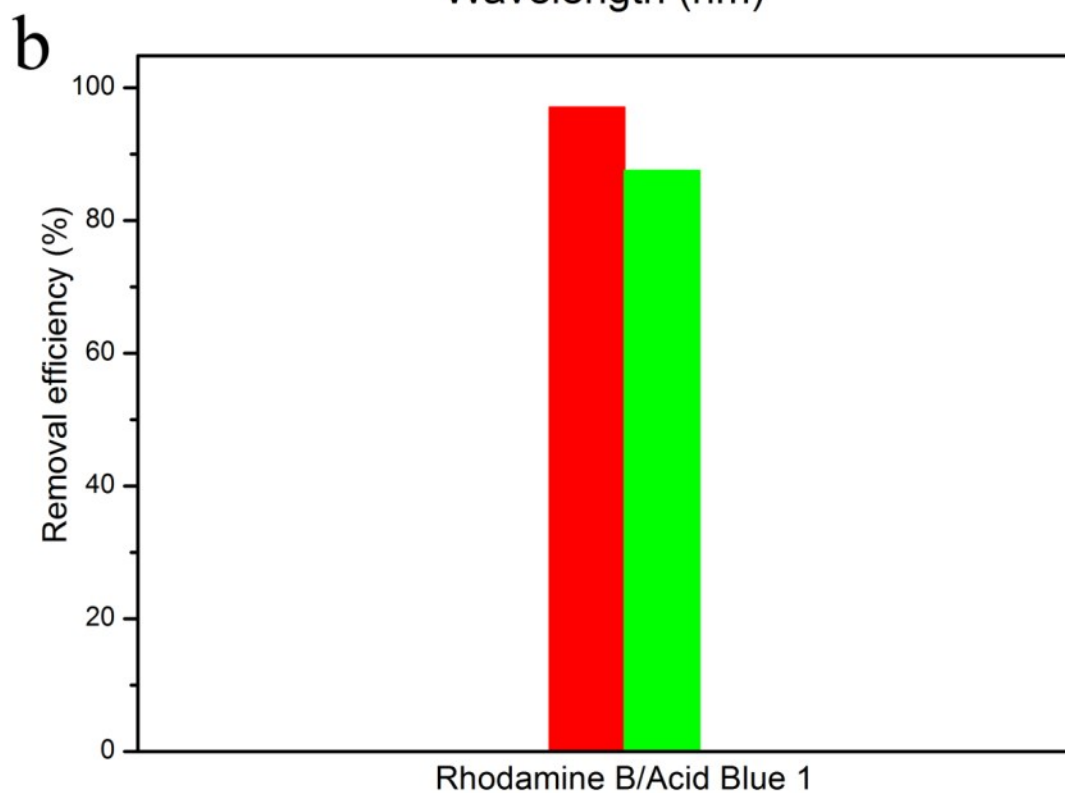

Fig. S7 (a) UV-Vis spectra of the binary mixture solution of RhB and Acid Blue 1 after the addition of PDVB-VI-0.2; (b) Comparison of the removal efficiency for dyes in the mixture of RhB and Acid Blue 1.
